# Supplementary material
Source: PubMed Central journal article supplement (PMC5592664)
Supplement: 10.1074_M117.783043_jbc.M117.783043-1.pdf [file 10.1074_M117.783043_jbc.M117.783043-1.pdf]

**Table S1**

| <b>Target</b>                            | <b>Forward Primer</b>        | <b>Reverse Primer</b>        |
|------------------------------------------|------------------------------|------------------------------|
| <b>RT-qPCR primers</b>                   |                              |                              |
| <i>Gapdh</i>                             | 5'-CTTTGTCAAGCTCATTTCTGG-3'  | 5'-TCtTGCTCAGTGCCTTGC-3'     |
| <i>Sp1</i>                               | 5'-CtCCAGACCATTAACCTCAGTG-3' | 5'-ACCAGATCCATGAAGACCAAG-3'  |
| <i>Atgl</i>                              | 5'-ATATCCCACTTTAGCTCCAAGG-3' | 5'-CAAGTTGTCTGAAATGCCGC-3'   |
| <i>Pparg</i>                             | 5'-ATAGGTGTGATCTTAACTGCCG-3' | 5'-CCAACAGCTTCTCCTTCTCG-3'   |
|                                          |                              |                              |
| <b>ChIP primers</b>                      |                              |                              |
| Sp1 binding site in <i>Atgl</i> promoter | 5'-CGGCGGAGGCGGAGACGCT-3'    | 5'-TCCCTGCTTGATCCAGTTGGAT-3' |
