# Supplementary material
Source: PubMed Central journal article supplement (PMC5592664)
Supplement: 10.1074_M117.783043_jbc.M117.783043-2.pdf [file 10.1074_M117.783043_jbc.M117.783043-2.pdf]

# Supplementary figure 1

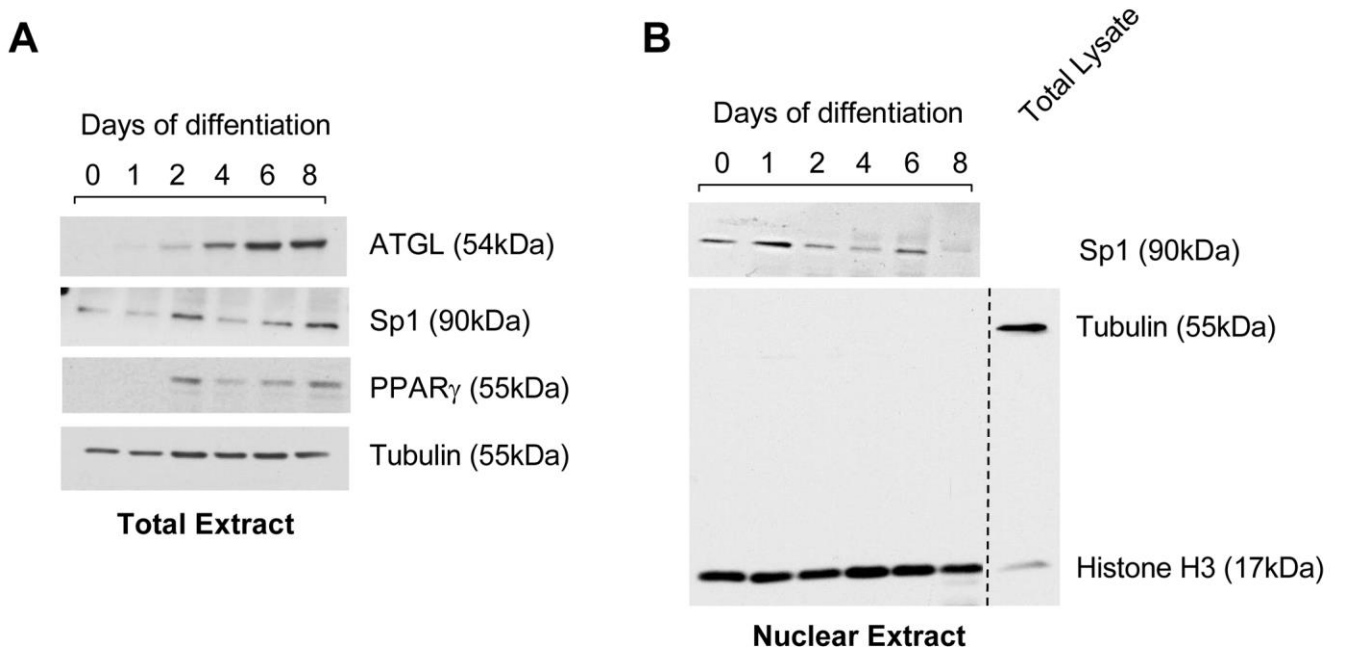

**FIGURE S1. Protein abundance during adipocyte differentiation.** (A) Total protein extract or (B) nuclear extract from differentiating 3T3-L1 cells were analyzed by Western blotting.
